# Supplementary material for: Aqueous humor metabolite profile of pseudoexfoliation glaucoma is distinctive
Source: Royal Society of Chemistry journal article supplement (doi:10.1039/c9mo00192a), 2020-02-24
Supplement: c9mo00192a1.zip [file c9mo00192a1.zip]

**Table 1: Aqueous Humor Human Subjects Information**

| Sample Number | Age | Gender | Right/Left Eye | Ophthalmic Medications                                           | Other Diseases                                  | Control                                      |                                         | PXE Material (+/-) | Max IOP (mmHg) | MD (dB) | PSD (dB) |
|---------------|-----|--------|----------------|------------------------------------------------------------------|-------------------------------------------------|----------------------------------------------|-----------------------------------------|--------------------|----------------|---------|----------|
|               |     |        |                |                                                                  |                                                 | Other Medications                            | Cataract Present (Cataract/No Cataract) |                    |                |         |          |
| N-4           |     | Male   | Left           | Cyclopentolate, Phenylephrine, Lidocaine                         | Coronary Artery Disease                         | Fluticasone                                  | Cataract                                |                    |                |         |          |
| N-5           | 75  | Male   | Right          | Cyclopentolate, Phenylephrine, Tetracaine, Lidocaine             |                                                 |                                              | Cataract                                |                    |                |         |          |
| N-12          | 62  | Male   | Left           | Tetracaine, Lidocaine                                            | Dyslipidemia, Vitamin D Deficiency              |                                              | Cataract                                |                    |                |         |          |
| N-14          | 64  | Male   | Right          | Cyclopentolate, Gentamicin, Phenylephrine, Tetracaine, Lidocaine | Diabetes Mellitus, Hyperlipidemia, Hypertension |                                              | Cataract                                |                    |                |         |          |
| N-19          | 71  | Male   |                | Cyclopentolate, Phenylephrine, Tetracaine, Lidocaine             | Hyperlipidemia                                  |                                              | Cataract                                |                    |                |         |          |
| N-28          | 75  | Male   | Right          | Cyclopentolate, Phenylephrine, Tetracaine, Lidocaine             | Dyslipidemia, Hypertension, Psoriasis           | Carvedilol, Ravitiding, Amlodipine           | Cataract                                |                    |                |         |          |
| N-29          | 70  | Male   |                | Cyclopentolate, Phenylephrine, Lidocaine                         |                                                 |                                              | Cataract                                |                    |                |         |          |
| N-30          | 52  | Male   | Right          | Cyclopentolate, Phenylephrine, Tetracaine, Lidocaine             | Diabetes Mellitus, Hyperlipidemia               | Insulin, Metformin, Saxagliptin, Amoxicillin | Cataract                                |                    |                |         |          |
| N-55          | 61  | Male   | Left           | Phenylephrine, Tetracaine, Lidocaine                             |                                                 |                                              | Cataract                                |                    |                |         |          |
| N-57          | 72  | Male   | Right          | Cyclopentolate, Phenylephrine, Lidocaine                         |                                                 |                                              | Cataract                                |                    |                |         |          |
| N-58          | 77  | Male   | Right          | Phenylephrine, Tetracaine, Lidocaine                             |                                                 |                                              | Cataract                                |                    |                |         |          |
| N-59          | 59  | Male   | Left           | Cyclopentolate, Phenylephrine, Lidocaine                         |                                                 |                                              | Cataract                                |                    |                |         |          |
| N-60          | 64  | Male   | Left           | Cyclopentolate, Phenylephrine, Tetracaine, Lidocaine             |                                                 |                                              | Cataract                                |                    |                |         |          |

|      |    |      |       |                                                            |                                                                                                                                                                                     |          |
|------|----|------|-------|------------------------------------------------------------|-------------------------------------------------------------------------------------------------------------------------------------------------------------------------------------|----------|
| N-61 | 64 | Male | Right | Cyclopentolate,<br>Phenylephrine,<br>Lidocaine             |                                                                                                                                                                                     | Cataract |
| N-62 | 73 | Male |       | Cyclopentolate,<br>Phenylephrine,<br>Lidocaine             |                                                                                                                                                                                     | Cataract |
| N-64 | 75 | Male |       | Cyclopentolate,<br>Phenylephrine,<br>Lidocaine, Tetracaine |                                                                                                                                                                                     | Cataract |
| N-65 | 68 | Male |       | Cyclopentolate,<br>Phenylephrine,<br>Lidocaine             |                                                                                                                                                                                     | Cataract |
| N-66 | 85 | Male | Right | Cyclopentolate,<br>Phenylephrine,<br>Lidocaine             |                                                                                                                                                                                     | Cataract |
| N-67 | 71 | Male | Left  | Phenylephrine,<br>Tetracaine, Lidocaine                    |                                                                                                                                                                                     | Cataract |
| N-68 | 64 | Male | Right | Cyclopentolate,<br>Phenylephrine,<br>Lidocaine             |                                                                                                                                                                                     | Cataract |
| N-69 | 68 | Male | Left  | Cyclopentolate                                             | Cyanocobalamin,<br>Diclofenac Na,<br>Pravastatin                                                                                                                                    | Cataract |
| N-70 | 72 | Male | Right | Phenylephrine, Tetracaine,<br>Lidocaine                    | Cyanocobalamin,<br>Insulin,<br>Losartan, Meloxicam,<br>Vanlafaxine,<br>Pregabaline,<br>Bisacodyl, Polyethylene,<br>Hydrocortisone,<br>Morphine Sulfate,<br>Naproxen,<br>Hydrocodone | Cataract |
| N-72 | 82 | Male | Left  | Cyclopentolate,<br>Phenylephrine, Lidocaine                | Clopidogrel,<br>Tamsulosin,<br>Finasteride, Vitamin D,<br>Metoprolol,<br>Hydrocodone                                                                                                | Cataract |
| N-73 | 77 | Male | Right | Cyclopentolate,<br>Phenylephrine, Lidocaine                | Diabetes Mellitus<br><br>Glipizide, Apixaban,<br>Ergocalciferol,<br>Atorvastatin,<br>Metoprolol Tartrate,<br>Terazosin, Amoxicillin,                                                | Cataract |

|      |    |      |       |                                                                                         |                                                                      |                                                                                                                                                           |             |
|------|----|------|-------|-----------------------------------------------------------------------------------------|----------------------------------------------------------------------|-----------------------------------------------------------------------------------------------------------------------------------------------------------|-------------|
| N-75 | 72 | Male | Left  | Cyclopentolate,<br>Phenylephrine, Lidocaine                                             |                                                                      | Ammonium Lactate,<br>Citalopram<br>Hydrobromide,<br>Mupirocin Ointment,<br>Urea Cream, Tramadol                                                           | Cataract    |
| POAG |    |      |       |                                                                                         |                                                                      |                                                                                                                                                           |             |
| G-27 | 61 | Male | Right | Latanoprost, Brimonidine,<br>Lidocaine                                                  |                                                                      |                                                                                                                                                           | No Cataract |
| G-29 | 73 | Male | Left  | Brimonidine, Latanoprost,<br>Tetracaine, Lidocaine,<br>Cyclopentolate                   |                                                                      |                                                                                                                                                           | No Cataract |
| G-30 | 79 | Male | Left  | Latanoprost, Brimonidine,<br>Fluriprofen, Phenylephrine,<br>Lidocaine                   |                                                                      |                                                                                                                                                           | No Cataract |
| G-31 | 76 | Male |       | Dorzolamide, Latanoprost,<br>Tetracaine, Lidocaine                                      |                                                                      |                                                                                                                                                           | No Cataract |
| G-33 | 73 | Male | Left  | Latanoprost, Brimonidine,<br>Tetracaine, Lidocaine,                                     |                                                                      |                                                                                                                                                           | Cataract    |
| G-34 | 69 | Male | Right | Dorzolamide, Latanoprost,<br>Cyclopentolate,<br>Phenylephrine, Tetracaine,<br>Lidocaine |                                                                      |                                                                                                                                                           | Cataract    |
| G-35 | 77 | Male | Right | Latanoprost,<br>Cyclopentolate,<br>Phenylephrine,<br>Lidocaine                          |                                                                      | Ketoconazole, Urea,<br>Allopurinol,<br>Carvedilol,<br>Pantoprazole                                                                                        | Cataract    |
| G-36 | 82 | Male | Left  | Polymyx B/Trimethoprim,<br>Cyclopentolate,<br>Phenylephrine, Lidocaine                  | Alzheimers Dementia                                                  | Edoxaban,<br>Cyanocobalamin,<br>Metoprolol Succinate,<br>Vitamin B,<br>Donepezil, Atropine<br>Sulfate                                                     | Cataract    |
| G-38 | 78 | Male | Right | Polymyx B/Trimethoprim,<br>Cyclopentolate,<br>Phenylephrine, Lidocaine                  | Diabetes Mellitus, Systemic<br>Hypertension,<br>Hypercholesterolemia | Levothyroxine,<br>Allopurinol,<br>Atrovastatin, Metformin,<br>Cyanocobalamin,<br>Vitamin D, Cephalexin,<br>Clohidine,<br>Hydrochlorothiazide,<br>Losartan | No Cataract |

|      |    |        |       |                                                                                                  |                                                                  |                                                                                                                                                          |             |
|------|----|--------|-------|--------------------------------------------------------------------------------------------------|------------------------------------------------------------------|----------------------------------------------------------------------------------------------------------------------------------------------------------|-------------|
| G-39 | 66 | Male   | Left  | Brimonidine, Dorzolamide,<br>Latanoprost, Cyclopentolate,<br>Phenylephrine, Lidocaine            |                                                                  | Terazosin, Sildenafil,<br>Lisinopril                                                                                                                     | No Cataract |
| G-40 | 70 | Male   | Left  | Dorzolamide HCl,<br>Latanoprost, Olopatadine HCl,<br>Brimonidine                                 | Diabetes Mellitus, Carpal<br>Tunnel, Diabetes Mellitus Type<br>2 | Insulin, Amlodipine,<br>Gabapentin,<br>Metformin, Fluorouracil<br>5% Cream, Silvadene<br>Cream, Doxycycline<br>monohydrate, Losartan,<br>Rosuvastatin CA | No Cataract |
| G-41 | 71 | Female | Right | Dorzolamide HCl, Timolol<br>Maleate, Latanoprost,<br>Cyclopentolate,<br>Phenylephrine, Lidocaine |                                                                  | Potassium Chloride,<br>Aspirin,<br>Fumotidine,<br>Furosemide, Lisinopril,<br>Loratadine, Nifedipine,<br>Allopurinol, Atorvastatin<br>Calcium, Gabapentin | No Cataract |
| G-42 | 95 | Female | Right | Latanoprost, Cyclopentolate,<br>Phenylephrine, Lidocaine                                         | Systemic Hypertension                                            | Amlodipine,<br>Furosemide,<br>Levothyroxine,<br>Metoprolol, Potassium<br>Chloride                                                                        | No Cataract |
| G-43 | 65 | Male   | Right | Brimonidine, Dorzolamide<br>HCl, Latanoprost,<br>Cyclopentolate,<br>Phenylephrine, Lidocaine     |                                                                  |                                                                                                                                                          | Cataract    |
| G-44 | 73 | Male   | Right | Dorzolamide, Atropine,<br>Cyclopentolate,<br>Phenylephrine, Lidocaine                            | Diabetes Mellitus Type 2                                         | Sildenafil, Aspirin,<br>Atorvastatin,<br>Calcium, Glipizide,<br>HCTZ, Insulin,<br>Amlodipine                                                             | No Cataract |
| G-45 | 71 | Male   | Left  | Latanoprost, Cyclopentolate,<br>Phenylephrine, Lidocaine.                                        | Prediabetes                                                      | Amlodipine                                                                                                                                               | No Cataract |

**PEX**

|       |    |        |       |                                                      |          |             |   |    |
|-------|----|--------|-------|------------------------------------------------------|----------|-------------|---|----|
| X-145 | 93 | Male   | Right | Latanoprost, 0.2% Brimonidine                        | PER      | Cataract    | + | 21 |
| X-154 | 68 | Male   | Left  | Latanoprost, 0.2% Brimonidine, Timolol, Brinzolamide |          | No Cataract | + | 13 |
| X-167 | 81 | Female | Left  | Latanoprost                                          | Coumadin | Cataract    | + | 13 |

|       |     |        |       |                                                           |                                                     |                                                |             |   |      |
|-------|-----|--------|-------|-----------------------------------------------------------|-----------------------------------------------------|------------------------------------------------|-------------|---|------|
| X-187 | 79  | Male   | Left  | Latanoprost, Levobunolol                                  |                                                     | Erythromycin                                   | Cataract    | + | 28   |
| X-188 | 102 | Male   | Right | Carboxymethyl Cellulose                                   |                                                     |                                                | Cataract    |   | 13   |
| X-197 | 80  | Male   | Left  | Carboxymethyl Cellulose                                   | Diabetes Mellitus                                   |                                                | Cataract    | + | 22   |
| X-200 | 79  | Female | Left  | Latanoprost, 0.2%<br>Brimonidine, Dorzolamide,<br>Timolol |                                                     |                                                | Cataract    | + | 27   |
| X-219 | 79  | Female | Right | Carboxymethyl Cellulose                                   | Hypertension                                        |                                                | Cataract    | - | 20   |
| X-336 | 86  | Female | Left  | Timolol                                                   |                                                     | Tamoxifen                                      | Cataract    | - | 17   |
| X-352 | 76  | Male   | Right | Latanoprost, Gentamicin,<br>Dorzolamide                   |                                                     |                                                | Cataract    | + | 17   |
| X-359 | 75  | Female | Left  | Latanoprost                                               |                                                     |                                                | Cataract    | - | 17   |
| X-362 | 79  | Male   | Right | Latanoprost, Levobunolol,<br>Carboxymethyl Cellulose      |                                                     |                                                | No Cataract | - | 18   |
| X-379 | 83  | Male   | Left  | Timolol                                                   | Arthritis, Gastritis,<br>Hypertension               |                                                | Cataract    | + | 22   |
| X-406 | 88  | Female | Left  | Latanoprost, Timolol                                      | Hypercholesterolemia, Skin<br>Cancer, Breast Cancer |                                                | Cataract    | + | 16() |
| X-413 | 67  | Male   | -     | Dorzolamide, Timolol, 0.2%<br>Brimonidine, Bimatoprost    | Diabetes Mellitus,<br>Hypertension                  |                                                | Cataract    | - | 33   |
| X-418 | 72  | Female | Right | Dorzolamide, Timolol                                      | Osteoporosis, Diabetes<br>Mellitus, Angina          |                                                | Cataract    | + | 19   |
| X-423 | 66  | Female | Left  | Latanoprost                                               | Hypertension, Arthritis                             |                                                | Cataract    | + | 23   |
| X-425 | 82  | Female | Left  | Azelastine                                                | Hypertension, Breast Cancer                         |                                                | Cataract    | - | 17   |
| X-449 | 75  | Female | Left  | Carboxymethyl Cellulose                                   |                                                     |                                                | Cataract    | - | 20   |
| X-459 | 73  | Male   | Right | Latanoprost, Timolol                                      | Diabetes Mellitus                                   |                                                | Cataract    | + | 15   |
| X-464 | 75  | Female | Right | Carboxymethyl Cellulose                                   | Gastritis, Arthritis                                | Ranitidine,<br>Erythromycin,<br>Pamine, Equate | Cataract    | + | 21   |

|       |    |        |       |                                                 |                                                                                                                                      |                                                                                              |          |   |        |      |       |
|-------|----|--------|-------|-------------------------------------------------|--------------------------------------------------------------------------------------------------------------------------------------|----------------------------------------------------------------------------------------------|----------|---|--------|------|-------|
| X-483 | 73 | Female | Left  | Carboxymethyl Cellulose                         |                                                                                                                                      |                                                                                              | Cataract | + | 13     |      |       |
| X-485 | 74 | Male   | Right | Timolol, Moxifloxacin                           | Prostate Cancer, Muscular Dystrophy                                                                                                  | Claritin, Pravachol                                                                          | Cataract | + | 17     |      | -2.73 |
| X-559 | 73 | Female | Left  | Bimatoprost                                     | Hypertension, Osteoporosis                                                                                                           | Multivitamins, Norvasc, Prevacid, Tranxene, Topical Iron                                     | Cataract | + | 16     | 2.02 | -6.97 |
| X-561 | 70 | Female | Left  | 0.2% Brimonidine                                | Osteoporosis, Diabetes Mellitus                                                                                                      | Glucophage, Glucotrol, Klonopin, Fosamax                                                     | Cataract | - | 22     | 1.73 | -6.47 |
| X-562 | 71 | Female | Left  | Timolol, Moxifloxacin, Latanoprost              | Diabetes Mellitus, Hypertension                                                                                                      | Vitamin B, Glucophage, Glucotrol, Lisinopril                                                 | Cataract | + | 17     | 2.22 |       |
| X-579 | 82 | Female | Right | Brinzolamide, Travoprost                        | Hypertension, Arthritis, Hypercholesterolemia                                                                                        |                                                                                              | Cataract | - | 13     |      |       |
| X-586 | 68 | Female | Left  | Dorzolamide, Timolol, Latanoprost, Moxifloxacin | Skin Cancer                                                                                                                          | Triamterene, Omeprazole, Paroxetine, Simvastatin, Ginkgo Biloba, Omega Fish Oil, B-12        | Cataract | + | 11(48) |      |       |
| X-598 | 81 | Male   | Left  | Carboxymethyl Cellulose                         | Diabetes Mellitus, Hypertension, Hypercholesterolemia, Gastric Ulcer                                                                 | Folic Acid, Multivitamins, Vitamin B6, Digoxin, Carvedilol, Lisinopril, Amlodipine, Klor-Con | Cataract | + | 20     |      |       |
| X-653 | 85 | Female | Right | Dorzolamide, Timolol, 2% Pilocarpine            | Hypertension, Diabetes Mellitus Type 2, Dementia, Anemia                                                                             |                                                                                              | Cataract | - | 27     |      |       |
| X-655 | 71 | Male   | Right | Moxifloxacin                                    | Arthritis, Skin Cancer, Spinal Stenosis, Bladder Cancer, Sciatica, Diverticulitis, COPD, Emphysema, Temporomandibular Joint Disorder |                                                                                              | Cataract | + | 21     |      |       |
