# Supplementary material for: Aqueous humor metabolite profile of pseudoexfoliation glaucoma is distinctive
Source: Royal Society of Chemistry journal article supplement (doi:10.1039/c9mo00192a), 2020-02-24
Supplement: c9mo00192a1.zip [file c9mo00192a1.zip]

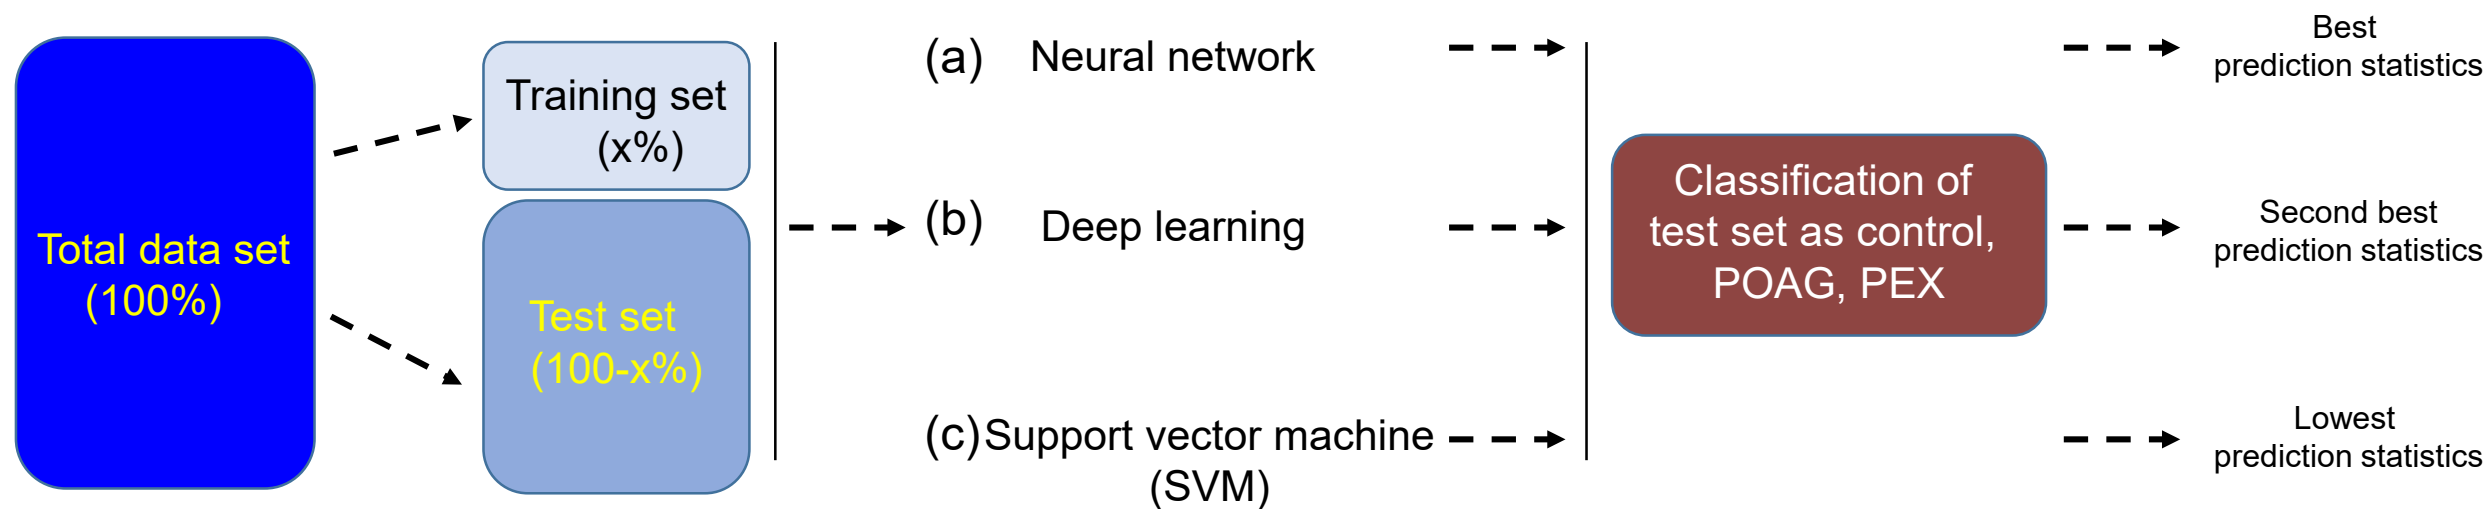

**Fig. S1** Outline of machine-learning. A part of the total patient metabolite data (x%) was used for training and 100 – x (%) of patients were used for testing each of the three algorithms in the RapidMiner program: (a) Neural Network (b) Deep Learning or (c) Support Vector Machines (SVM) as shown.

a)

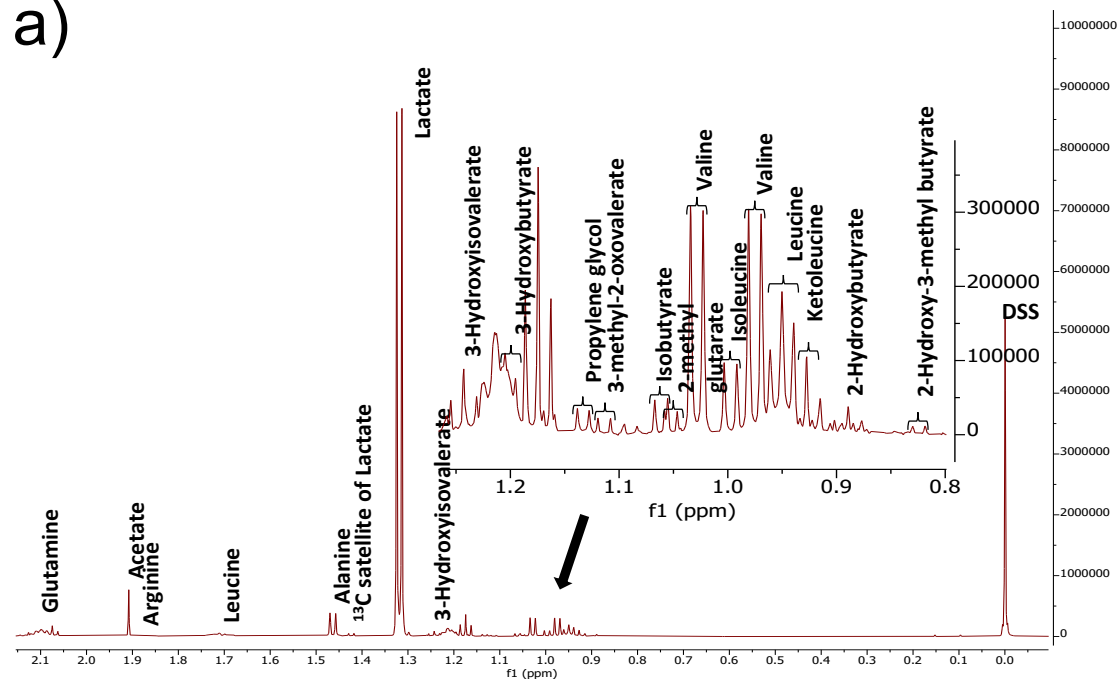

b)

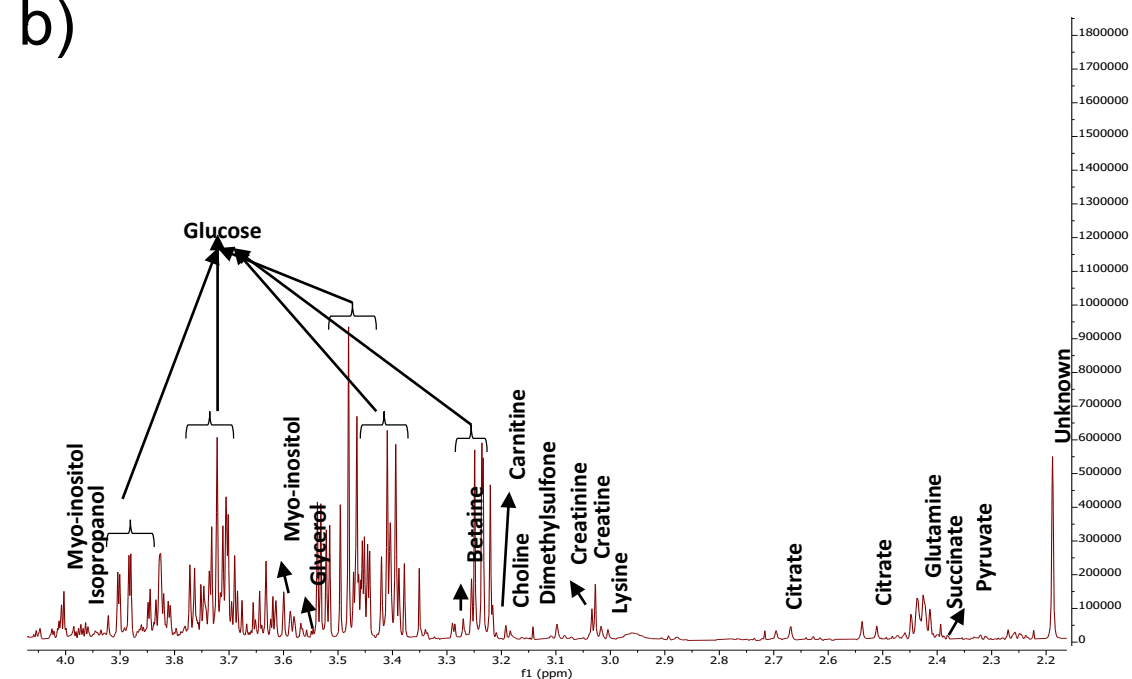

c)

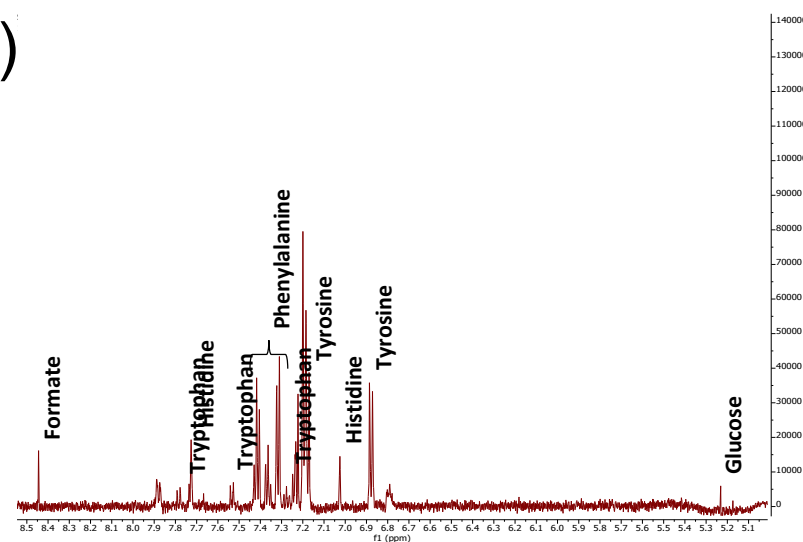

**Fig. S2** Representative assignment of some of the metabolites for control aqueous humor sample a) Representative sample N12 (Aliphatic region), b) Representative control sample (N12) (Aliphatic region), c) Control sample(N12) (Aromatic region)

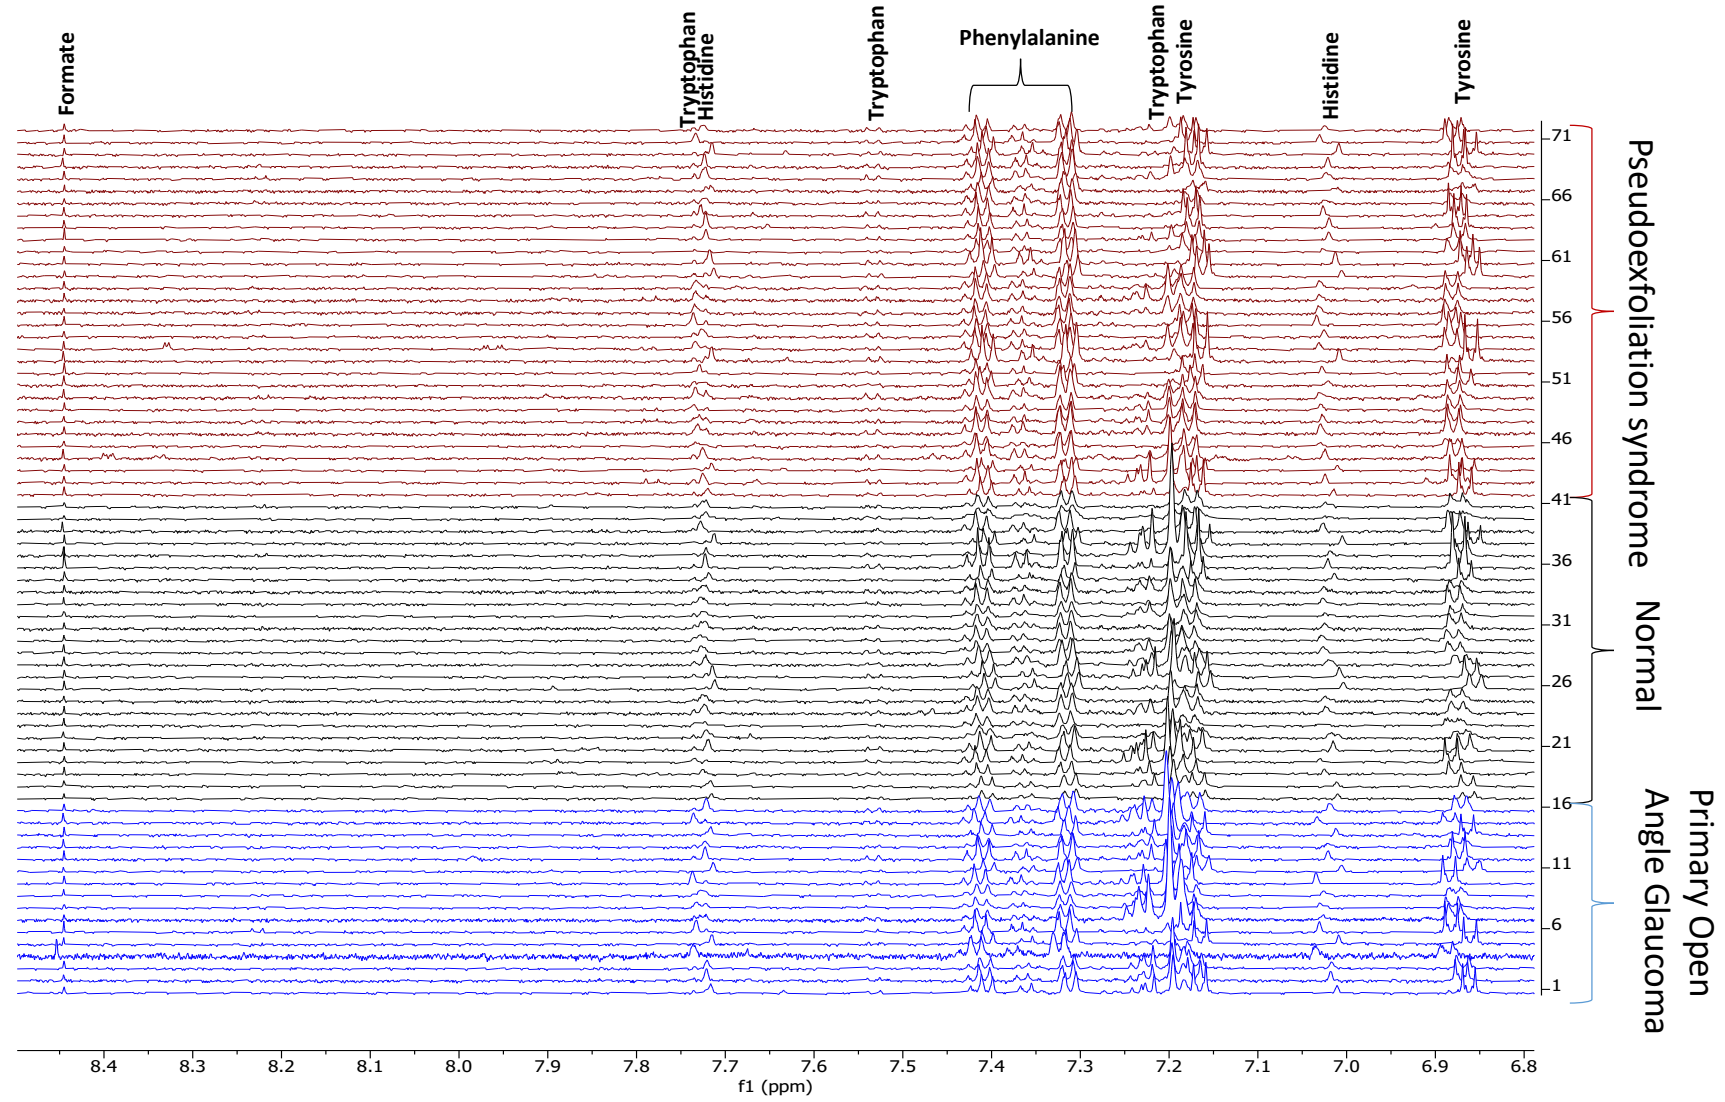

**Fig. S3** Representative comparison of aromatic regions for control (Normal), POAG and PEX samples as indicated.

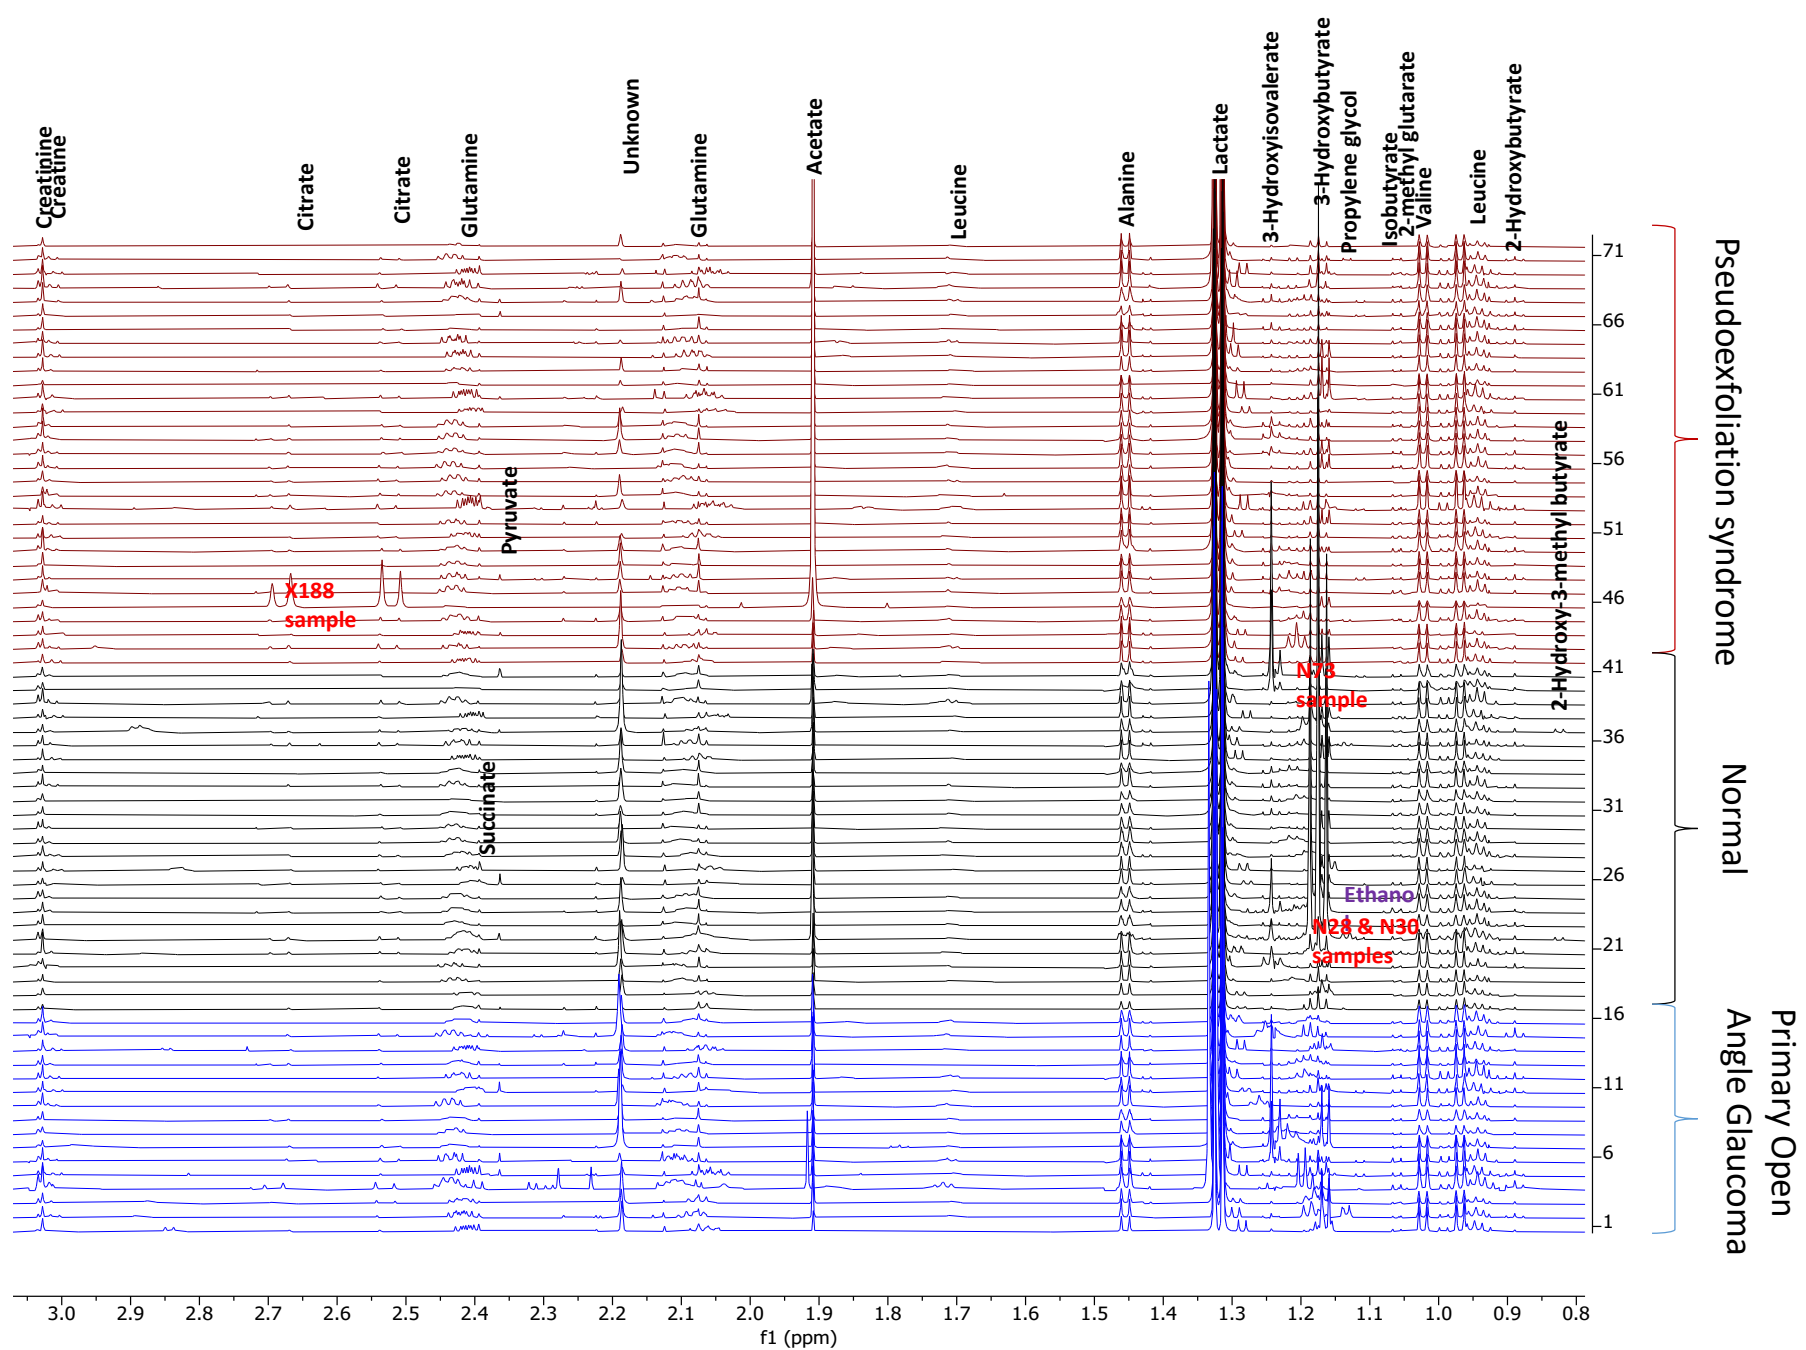

**Fig. S4** Representative comparison of aliphatic regions for control (Normal), POAG and PEX samples as indicated

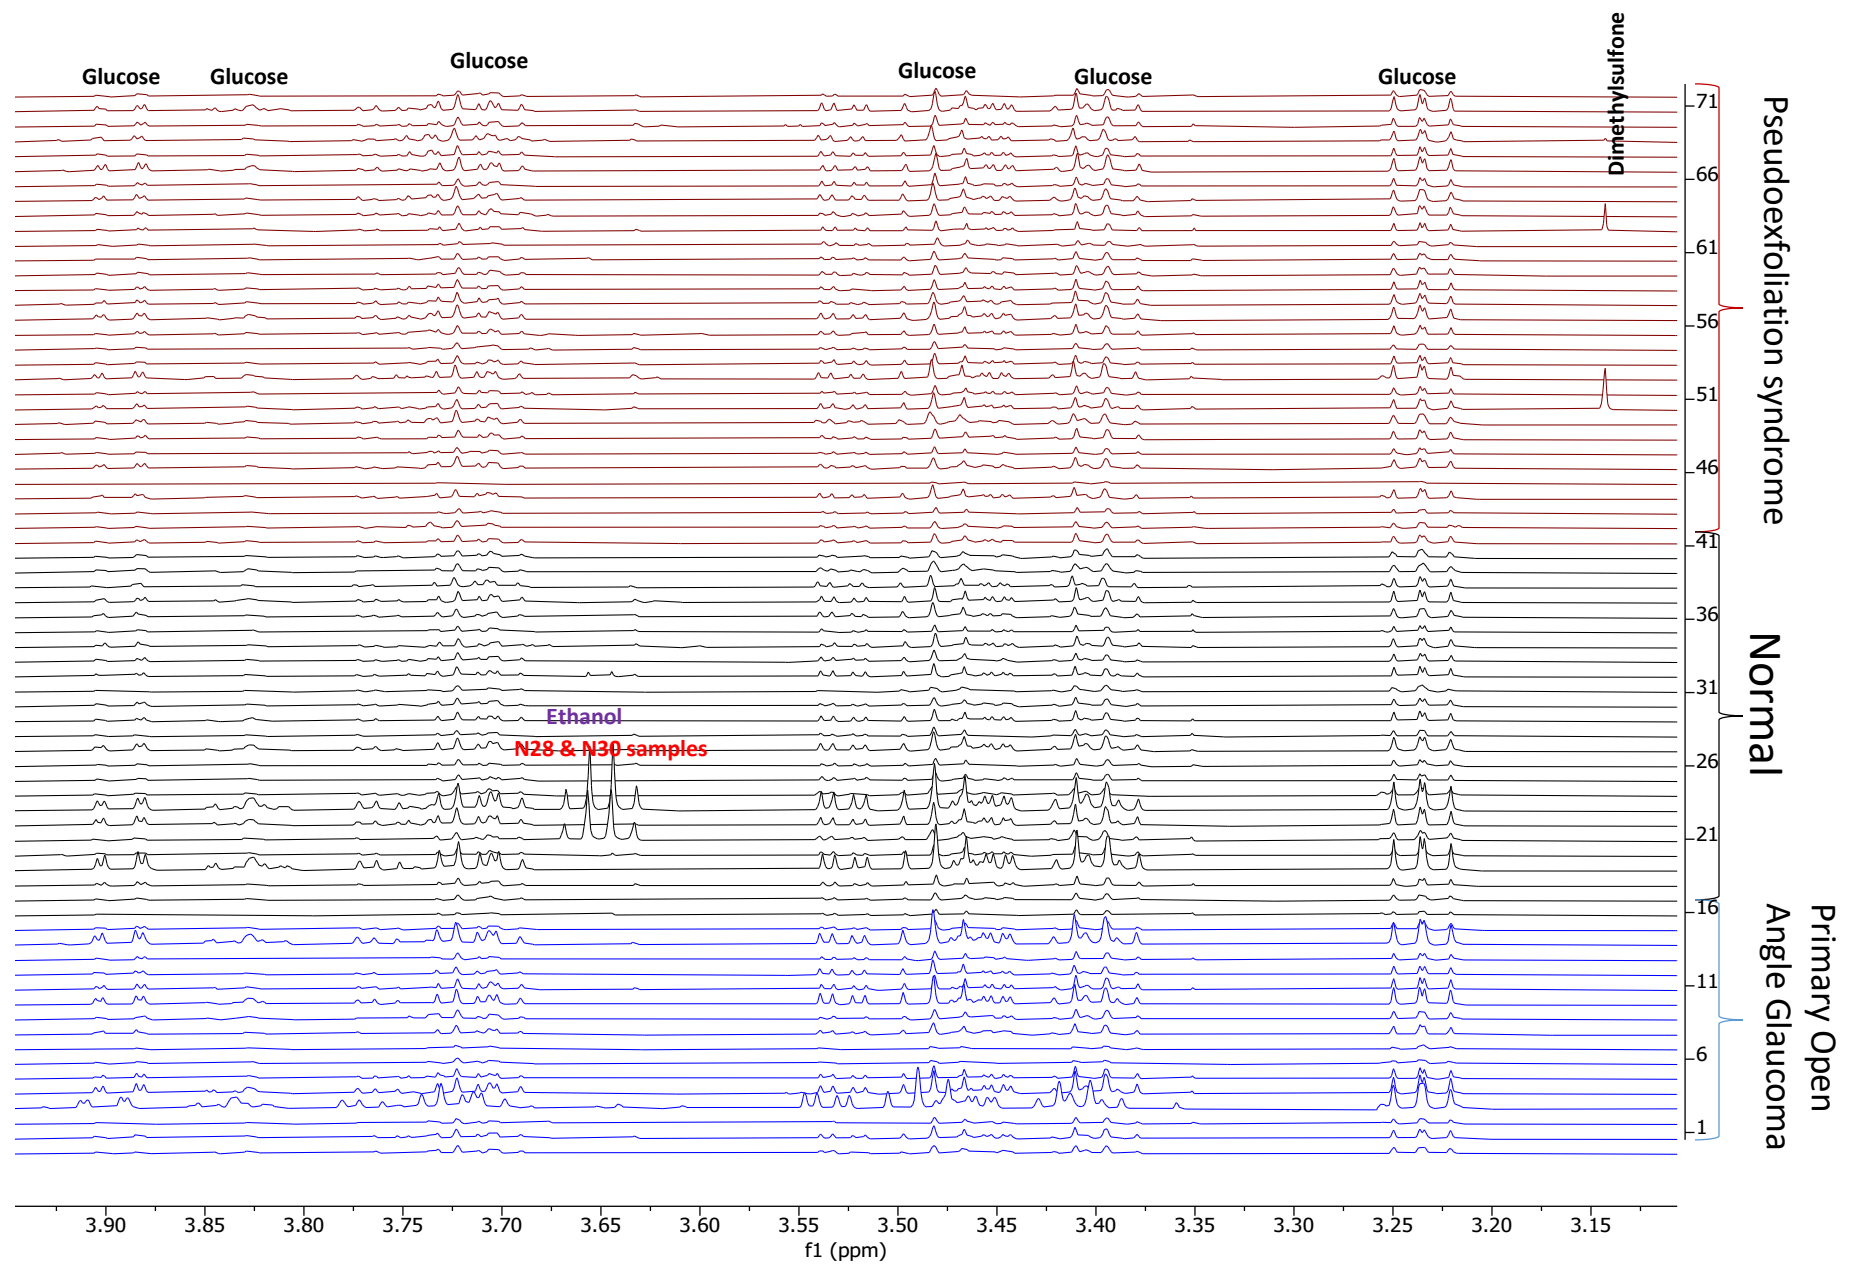

**Fig. S5** Representative comparison of aliphatic regions for control, POAG and PEX samples

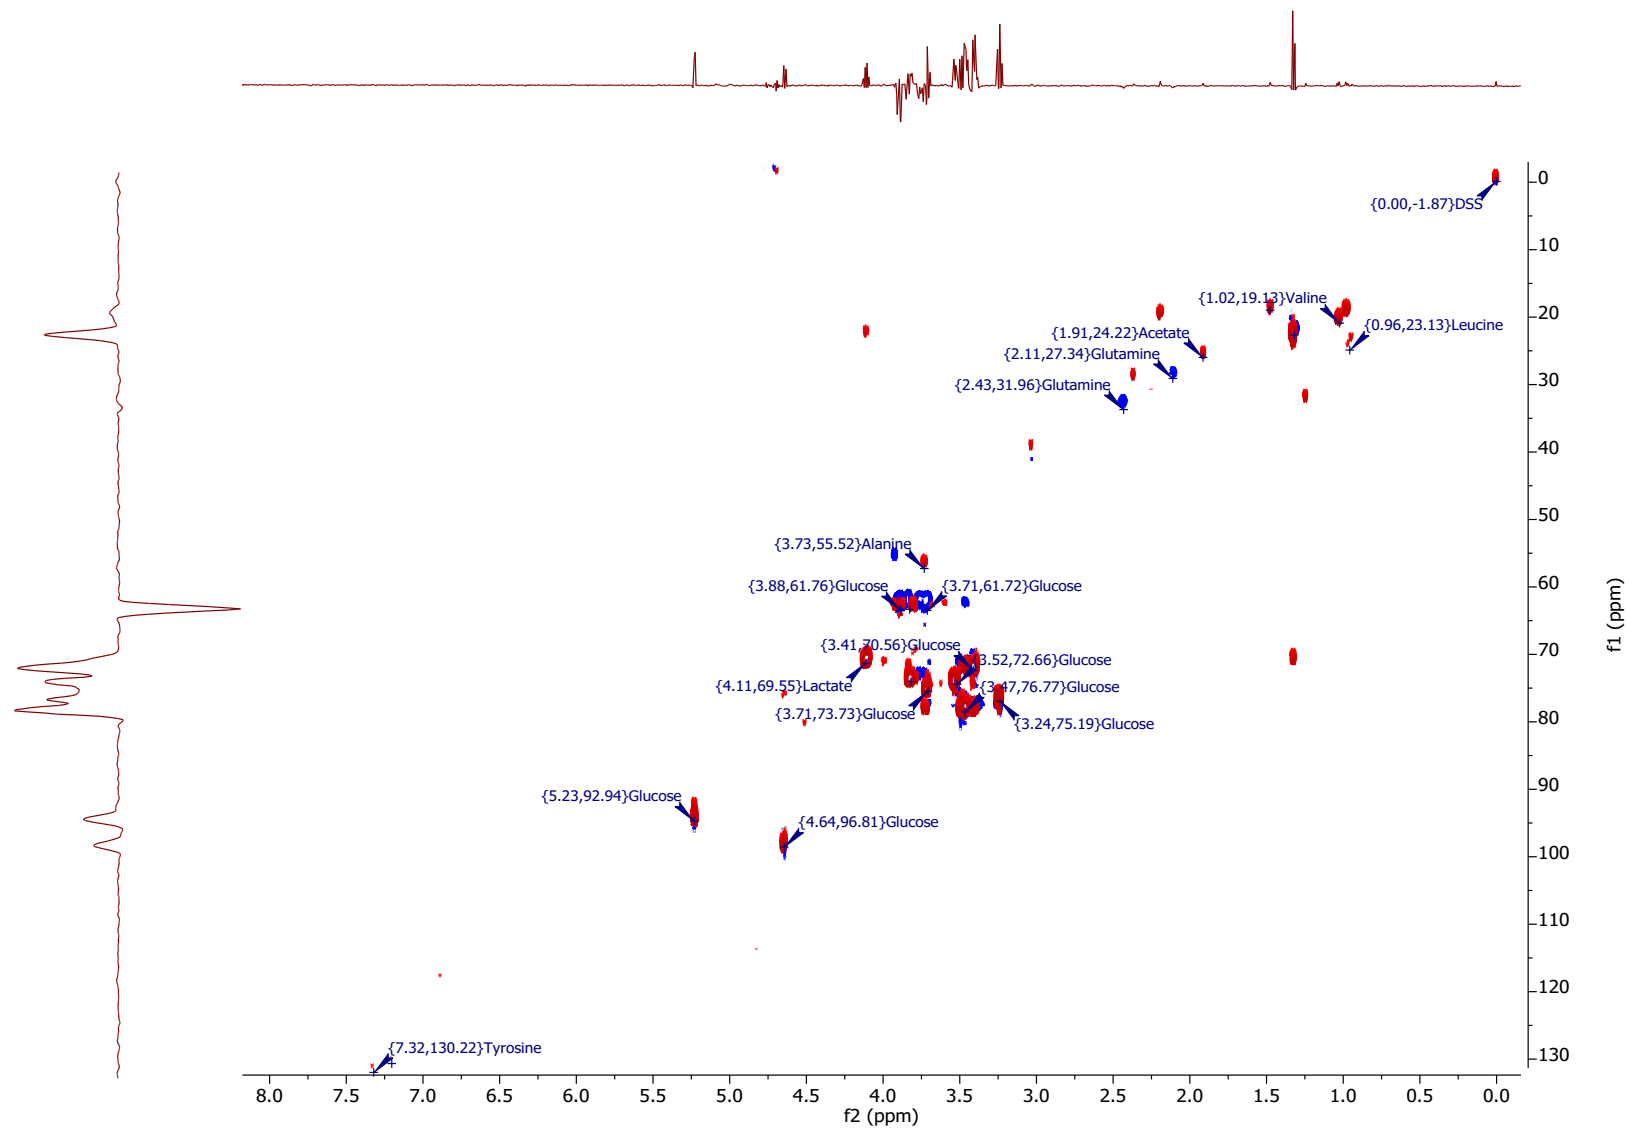

**Fig. S6** A representative HSQC spectrum acquired for a control sample (sample N4)



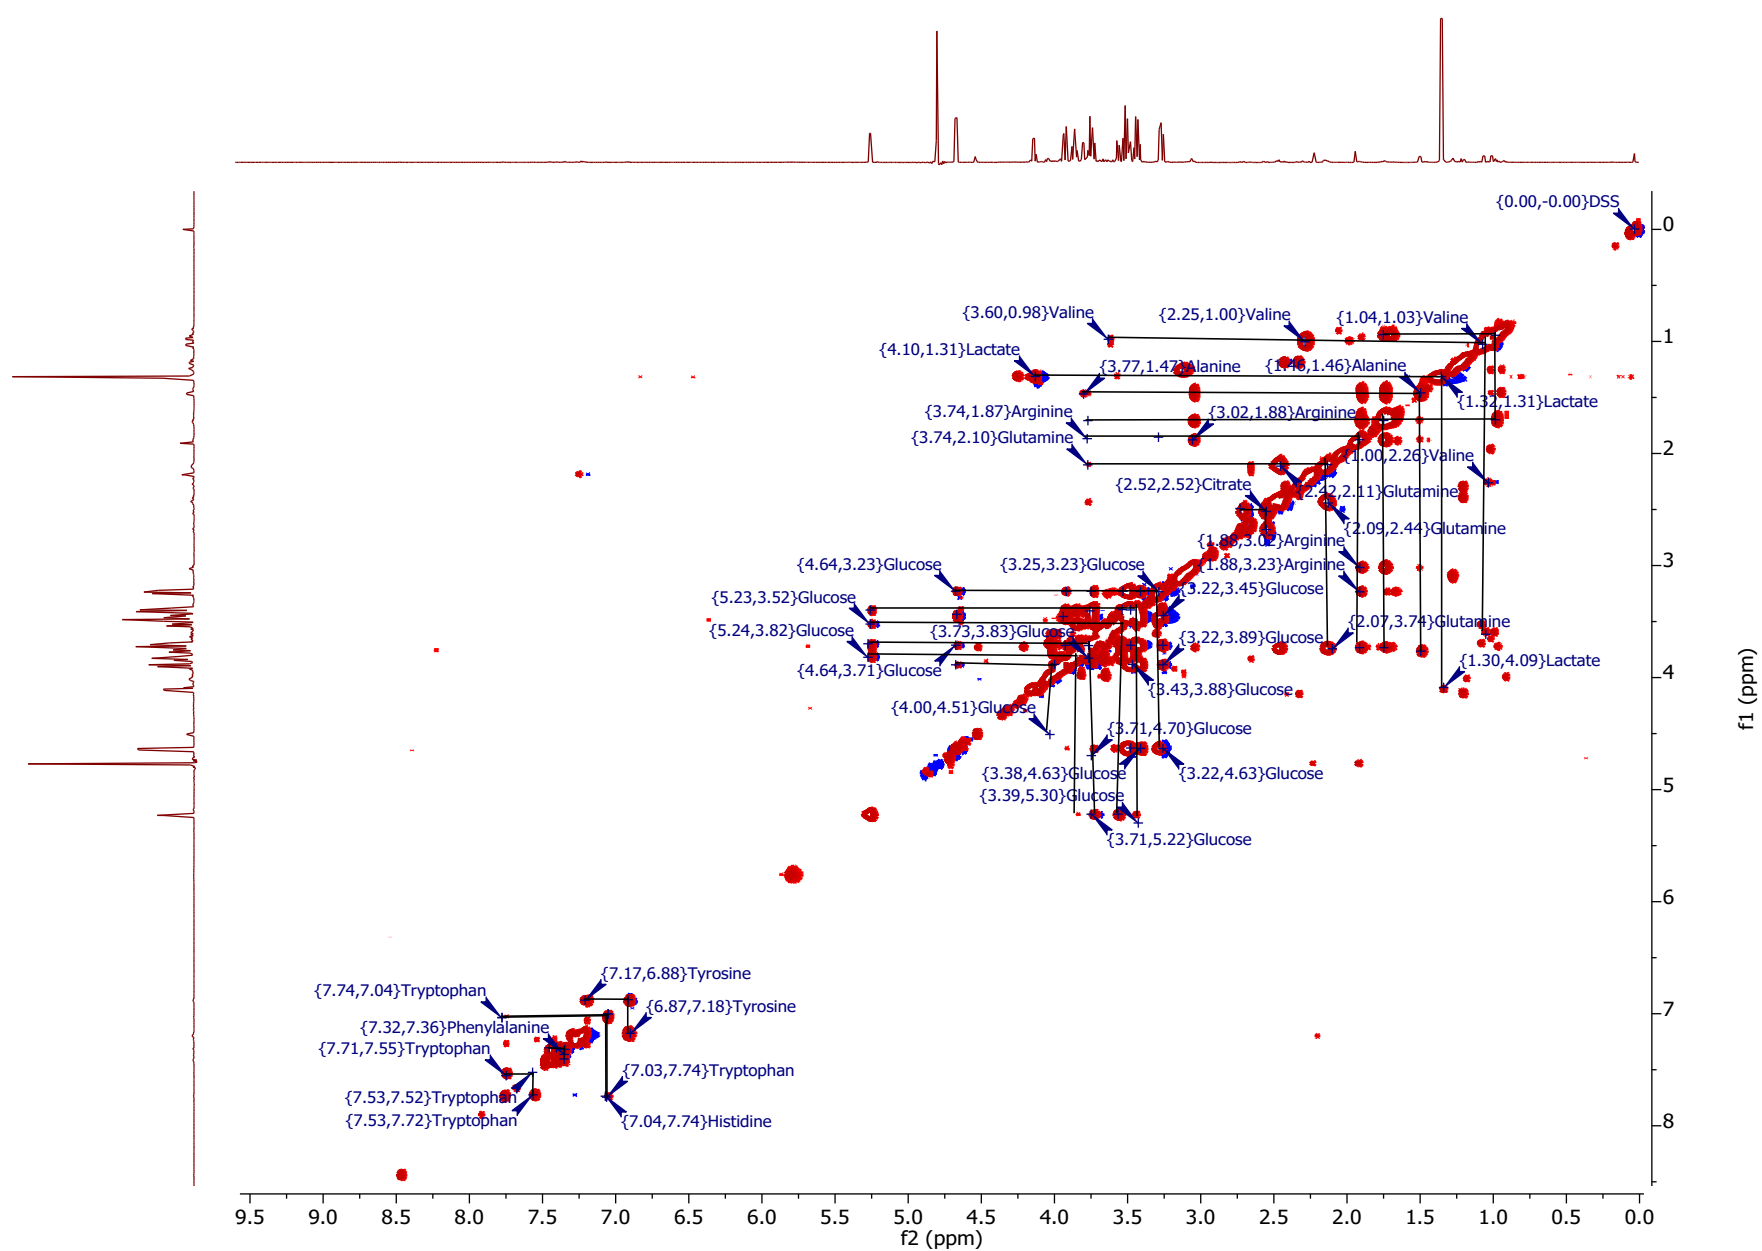

**Fig. S8** A representative TOCSY spectrum acquired for a pseudoexfoliation (PEX) sample (sample G7)



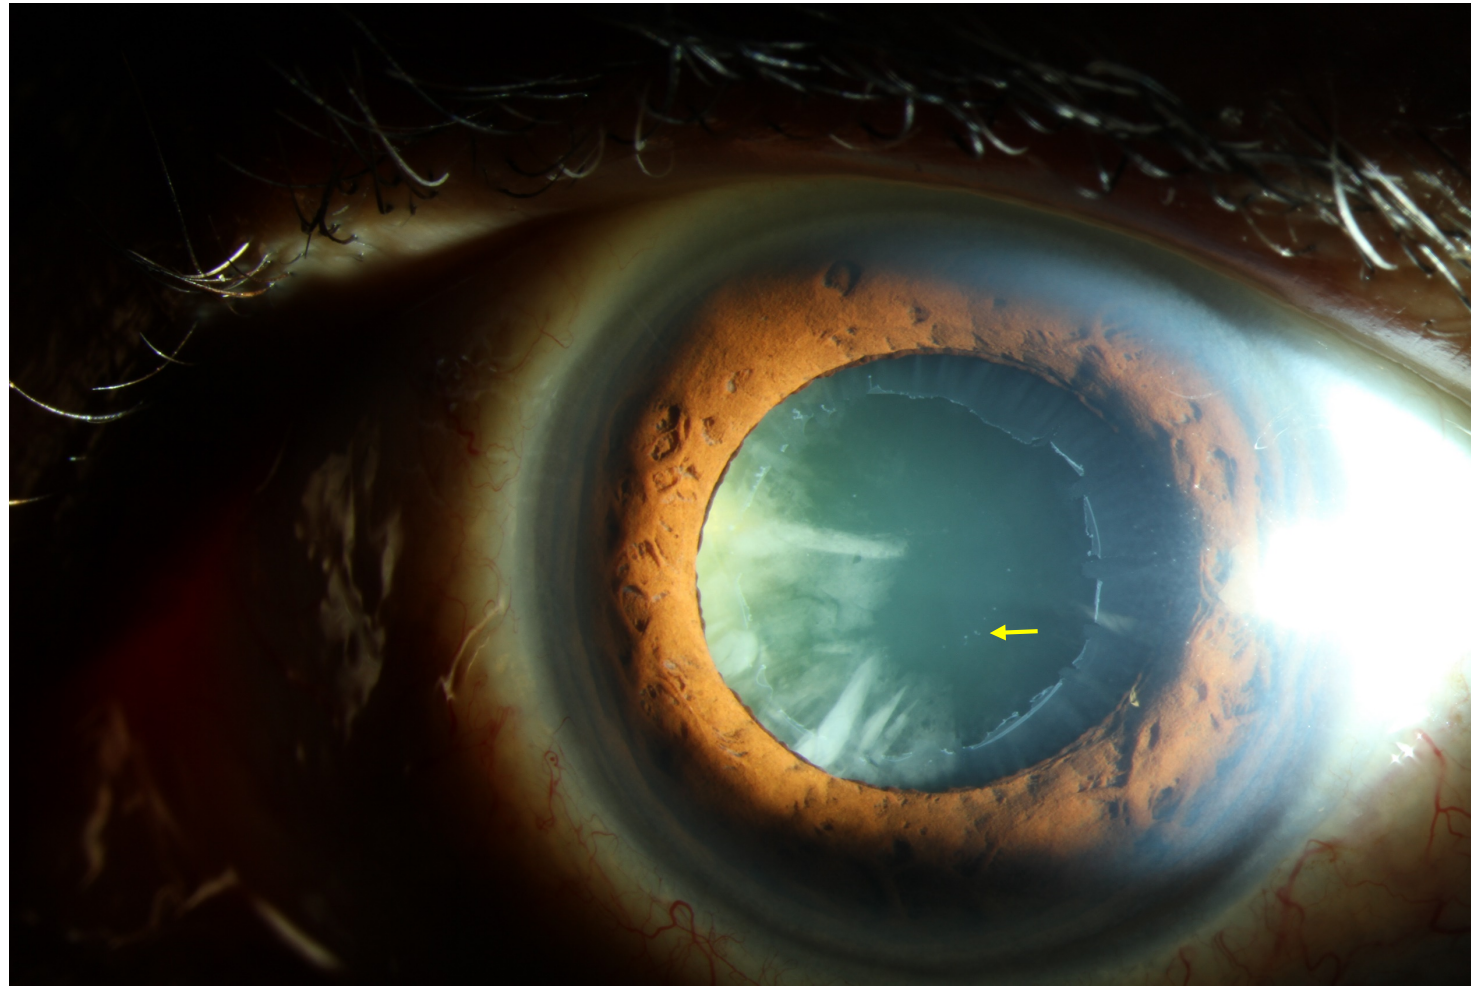

**Fig. S9** A representative of a pseudoexfoliation eye from a 74 year old male showing the fluffy deposits (arrow) on the crystalline lens. The patient has no other medical problems except osteoporosis of the knees.
